# Supplementary material for: Genetic diversity of 21 experimental chicken lines with diverse origins and genetic backgrounds
Source: PubMed Central journal article supplement — Exp Anim. 2018 Dec 13;68(2):177–93. doi: 10.1538/expanim.18-0139 (PMC6511517; doi:10.1538/expanim.18-0139), 2018-12-13
Supplement: expanim-68-177-s001.pdf [file expanim-68-177-s001.pdf]

Table S2. Presence of null alleles determined by the chi-square test for Hardy-Weinberg equilibrium

|        | MCW0248 | MCW0111 | MCW0112 | ADL0268 | MCW0145 | LEI0234 | ADL0190 | MCW0206 | ADL0257 | LEI0096 | MCW0034 | LEI0228 |
|--------|---------|---------|---------|---------|---------|---------|---------|---------|---------|---------|---------|---------|
| GSP    | no      | yes     | no      | no      |
| GSN/1  | no      |
| YL     | no      | yes     |
| PNP    | no      |
| BM-C   | no      |
| WL-G   | no      |
| WL-M/O | no      |
| BL-E   | no      |
| RIR    | no      |
| GB     | yes     | no      |
| CAL    | no      | no      | no      | no      | no      | yes     | no      | no      | no      | no      | no      | no      |
| DD     | no      | no      | no      | no      | yes     | no      |
| SIL    | no      | no      | no      | no      | yes     | no      | no      | no      | no      | no      | no      | yes     |
| CHN    | no      |
| EJ     | no      | yes     | no      |
| PC     | no      | yes     |
| JB     | no      |
| CB     | no      | yes     |
| #413   | no      |
| OS     | no      | no      | yes     | no      |
| RJF    | no      | yes     | yes     | no      | yes     | no      |

ADL0146 MCW0222 MCW0103 MCW0252 MCW0016 LEI0166 MCW0037 MCW0295 MCW0167 LEI0094 MCW0240 MCW0098 MCW0193 MCW0078

|     |    |    |     |    |    |     |    |     |    |     |     |    |     |
|-----|----|----|-----|----|----|-----|----|-----|----|-----|-----|----|-----|
| no  | no | no | no  | no | no | no  | no | no  | no | no  | no  | no | no  |
| no  | no | no | no  | no | no | no  | no | no  | no | no  | no  | no | no  |
| no  | no | no | no  | no | no | no  | no | no  | no | no  | no  | no | no  |
| no  | no | no | no  | no | no | no  | no | no  | no | no  | no  | no | no  |
| no  | no | no | no  | no | no | no  | no | no  | no | no  | no  | no | no  |
| no  | no | no | no  | no | no | no  | no | no  | no | no  | no  | no | no  |
| no  | no | no | no  | no | no | no  | no | no  | no | no  | yes | no | no  |
| no  | no | no | no  | no | no | no  | no | no  | no | no  | no  | no | no  |
| no  | no | no | no  | no | no | no  | no | no  | no | no  | no  | no | no  |
| no  | no | no | no  | no | no | no  | no | no  | no | no  | no  | no | no  |
| no  | no | no | no  | no | no | no  | no | no  | no | no  | no  | no | no  |
| no  | no | no | no  | no | no | no  | no | no  | no | no  | no  | no | yes |
| yes | no | no | no  | no | no | no  | no | no  | no | no  | no  | no | no  |
| no  | no | no | no  | no | no | no  | no | no  | no | no  | no  | no | no  |
| no  | no | no | no  | no | no | no  | no | no  | no | yes | no  | no | no  |
| no  | no | no | no  | no | no | yes | no | no  | no | no  | no  | no | no  |
| no  | no | no | no  | no | no | no  | no | no  | no | no  | no  | no | no  |
| no  | no | no | yes | no | no | no  | no | no  | no | yes | no  | no | no  |
| no  | no | no | no  | no | no | no  | no | no  | no | no  | no  | no | no  |
| no  | no | no | no  | no | no | no  | no | no  | no | no  | no  | no | no  |
| no  | no | no | no  | no | no | no  | no | yes | no | no  | yes | no | yes |

| MCW0081 | LEI0192 | MCW0014 | LEI0196 | MCW0183 | ADL0169 | ADL0258 | ADL0278 | MCW0134 | MCW0067 | ADL0106 | ADL0112 | ADL0210 | LEI0099 |
|---------|---------|---------|---------|---------|---------|---------|---------|---------|---------|---------|---------|---------|---------|
| no      |
| no      |
| no      |
| no      |
| no      |
| no      | no      | no      | yes     | no      |
| no      |
| no      |
| no      |
| no      | yes     | no      | no      | no      |
| no      |
| no      |
| no      | yes     | no      | no      | no      |
| no      | no      | no      | no      | no      | yes     | no      |
| no      | no      | yes     | yes     | no      | no      | no      | yes     | no      | no      | no      | no      | no      | no      |
| no      |
| no      | yes     |
| no      |
| no      |
| no      | no      | no      | no      | no      | yes     | no      | no      | no      | no      | no      | yes     | yes     | no      |

---

ADL0147 MCW0216 MCW0104 MCW0123 MCW0330 MCW0217 MCW0287 MCW0165 MCW0069 MCW0233 ADL0284 MCW0331 ADL0273 LEI0075

---

|     |     |    |    |    |    |     |     |     |    |     |     |     |     |
|-----|-----|----|----|----|----|-----|-----|-----|----|-----|-----|-----|-----|
| no  | no  | no | no | no | no | no  | no  | no  | no | no  | no  | no  | yes |
| no  | no  | no | no | no | no | no  | no  | no  | no | no  | no  | no  | no  |
| yes | no  | no | no | no | no | no  | no  | no  | no | yes | no  | no  | no  |
| no  | no  | no | no | no | no | no  | no  | no  | no | no  | no  | no  | no  |
| no  | no  | no | no | no | no | no  | no  | no  | no | no  | no  | no  | no  |
| no  | no  | no | no | no | no | no  | no  | no  | no | no  | no  | no  | no  |
| no  | no  | no | no | no | no | no  | no  | yes | no | no  | no  | yes | no  |
| no  | no  | no | no | no | no | no  | no  | no  | no | no  | no  | no  | no  |
| no  | no  | no | no | no | no | no  | no  | no  | no | no  | no  | no  | no  |
| no  | no  | no | no | no | no | no  | no  | no  | no | no  | no  | no  | no  |
| no  | no  | no | no | no | no | no  | no  | no  | no | no  | no  | no  | no  |
| no  | yes | no | no | no | no | no  | no  | no  | no | no  | no  | no  | no  |
| no  | no  | no | no | no | no | no  | no  | no  | no | no  | no  | no  | no  |
| no  | no  | no | no | no | no | yes | no  | no  | no | no  | no  | no  | no  |
| no  | no  | no | no | no | no | no  | yes | no  | no | yes | no  | no  | no  |
| no  | no  | no | no | no | no | no  | no  | no  | no | no  | no  | yes | yes |
| no  | no  | no | no | no | no | no  | no  | no  | no | no  | no  | no  | yes |
| no  | no  | no | no | no | no | no  | no  | no  | no | no  | no  | no  | no  |
| no  | no  | no | no | no | no | no  | no  | no  | no | no  | no  | no  | no  |
| no  | no  | no | no | no | no | no  | no  | no  | no | no  | no  | no  | no  |
| no  | no  | no | no | no | no | no  | no  | no  | no | no  | no  | no  | no  |
| no  | no  | no | no | no | no | no  | no  | no  | no | no  | yes | no  | yes |

---

Table S3. Diagnostic locus at which a specific allele was found at 100% frequency within line.

| Locus   | Line   | Fragment size of allele |
|---------|--------|-------------------------|
| MCW0248 | RJF    | 222                     |
| MCW0112 | WL-M/O | 278                     |
| ADL0257 | BM-C   | 198                     |
|         | OS     | 173                     |
| MCW0034 | RIR    | 240                     |
| LEI0228 | OS     | 412                     |
| ADL0146 | CB     | 155                     |
| MCW0103 | BL-E   | 267                     |
| MCW0252 | PNP    | 297                     |
|         | SIL    | 299                     |
| LEI0166 | DD     | 346                     |
| LEI0094 | GSP    | 282                     |
| MCW0014 | BL-E   | 182                     |
| LEI0196 | SIL    | 204                     |
|         | BM-C   | 187                     |
| ADL0112 | BM-C   | 132                     |
| LEI0099 | SIL    | 133                     |
| MCW0216 | PNP    | 146                     |
| MCW0123 | SIL    | 100                     |
| ADL0273 | YL     | 136                     |
|         | CB     | 137                     |
| LEI0075 | RIR    | 171                     |
|         | CHN    | 168                     |
